# Supplementary material for: Changes in Polar Metabolites during Seed Germination and Early Seedling Development of Pea, Cucumber, and Wheat
Source: MDPI journal article supplement (doi:10.3390/agriculture13122278), 2023-12-15
Supplement: s1 [file s1]

**Table S1.** Changes in the length (L, mm), fresh weight (FW, in mg/part or mg/2 cotyledons), and water content (WC, as % of FW) during 7 days of seed germination and seedling development of pea, cucumber, and wheat. Values are means of 3-5 replicates. Abbreviations: PR – primary root, Rs- root system, Ep – epicotyl, C – 2 cotyledons, S – shoot (coleoptile with leaf), E – endosperm with seed coat.

| <i>Pisum sativum</i> L. cv Hubal |       |    |        |    |     |       |    |    | <i>Cucumis sativus</i> L. cv Polan F1 |    |        |    |    |       |    |    |       | <i>Triticum aestivum</i> L. cv Forkida |        |    |    |       |    |     |  |  |    |  |  |    |  |  |    |  |  |    |  |  |     |  |  |    |  |  |
|----------------------------------|-------|----|--------|----|-----|-------|----|----|---------------------------------------|----|--------|----|----|-------|----|----|-------|----------------------------------------|--------|----|----|-------|----|-----|--|--|----|--|--|----|--|--|----|--|--|----|--|--|-----|--|--|----|--|--|
| Day                              | L, mm |    | FW, mg |    |     | WC, % |    |    | L, mm                                 |    | FW, mg |    |    | WC, % |    |    | L, mm |                                        | FW, mg |    |    | WC, % |    |     |  |  |    |  |  |    |  |  |    |  |  |    |  |  |     |  |  |    |  |  |
|                                  | PR    | Ep | PR     | Ep | C   | PR    | Ep | C  | PR                                    | H  | Rs     | H  | C  | Rs    | H  | C  | Rs    | S                                      | Rs     | S  | E  | Rs    | S  | E   |  |  |    |  |  |    |  |  |    |  |  |    |  |  |     |  |  |    |  |  |
| 0                                | 4*    |    | 2*     |    |     | 259   |    |    | 5*                                    |    |        | 6  |    |       | -* |    |       | 2*                                     |        |    | 17 |       |    | 4*  |  |  | 5  |  |  | -* |  |  | 3* |  |  | 41 |  |  | 6*  |  |  | 5  |  |  |
| 1                                | 6*    |    | 8*     |    |     | 389   |    |    | 53*                                   |    |        | 39 |    |       | -* |    |       | 3*                                     |        |    | 26 |       |    | 65* |  |  | 37 |  |  | -* |  |  | 4* |  |  | 67 |  |  | 72* |  |  | 31 |  |  |
| 2                                | 8*    |    | 11*    |    |     | 510   |    |    | 72*                                   |    |        | 54 |    |       | -* |    |       | 8*                                     |        |    | 29 |       |    | 87* |  |  | 46 |  |  | -* |  |  | 6* |  |  | 71 |  |  | 82* |  |  | 35 |  |  |
| 3                                | 13    | 3  | 24     | 18 | 480 | 89    | 87 | 54 | 38*                                   |    | 18*    |    | 29 | 92*   |    | 49 | 7     | 5                                      | 4      | 3  | 73 | 85    | 81 | 41  |  |  |    |  |  |    |  |  |    |  |  |    |  |  |     |  |  |    |  |  |
| 4                                | 28    | 4  | 45     | 27 | 447 | 92    | 83 | 52 | 49                                    | 6  | 21     | 11 | 38 | 94    | 93 | 61 | 15    | 7                                      | 35     | 25 | 68 | 89    | 88 | 46  |  |  |    |  |  |    |  |  |    |  |  |    |  |  |     |  |  |    |  |  |
| 5                                | 36    | 7  | 55     | 39 | 464 | 90    | 87 | 54 | 67                                    | 11 | 35     | 23 | 44 | 95    | 94 | 75 | 26    | 11                                     | 48     | 57 | 63 | 90    | 90 | 53  |  |  |    |  |  |    |  |  |    |  |  |    |  |  |     |  |  |    |  |  |
| 6                                | 50    | 14 | 82     | 63 | 467 | 91    | 88 | 55 | 85                                    | 21 | 54     | 64 | 62 | 95    | 95 | 79 | 45    | 38                                     | 64     | 69 | 63 | 90    | 89 | 60  |  |  |    |  |  |    |  |  |    |  |  |    |  |  |     |  |  |    |  |  |
| 7                                | 58    | 19 | 105    | 93 | 460 | 91    | 89 | 55 | 96                                    | 23 | 55     | 83 | 64 | 95    | 96 | 82 | 59    | 51                                     | 73     | 69 | 68 | 91    | 89 | 64  |  |  |    |  |  |    |  |  |    |  |  |    |  |  |     |  |  |    |  |  |

\*- embryonic axis (in pea and cucumber) or whole embryo (wheat), \*\*- the central root of primary seminal roots
